# Supplementary material for: Comprehensive analysis of the competing endogenous circRNA-lncRNA-miRNA-mRNA network and identification of a novel potential biomarker for hepatocellular carcinoma
Source: publisher site journal article supplement (doi:10.18632/aging.203056), 2021-05-28
Supplement: Supplementary file [file aging-v13i12-203056-supplementary-material-SD1.pdf]

## SUPPLEMENTARY FIGURE

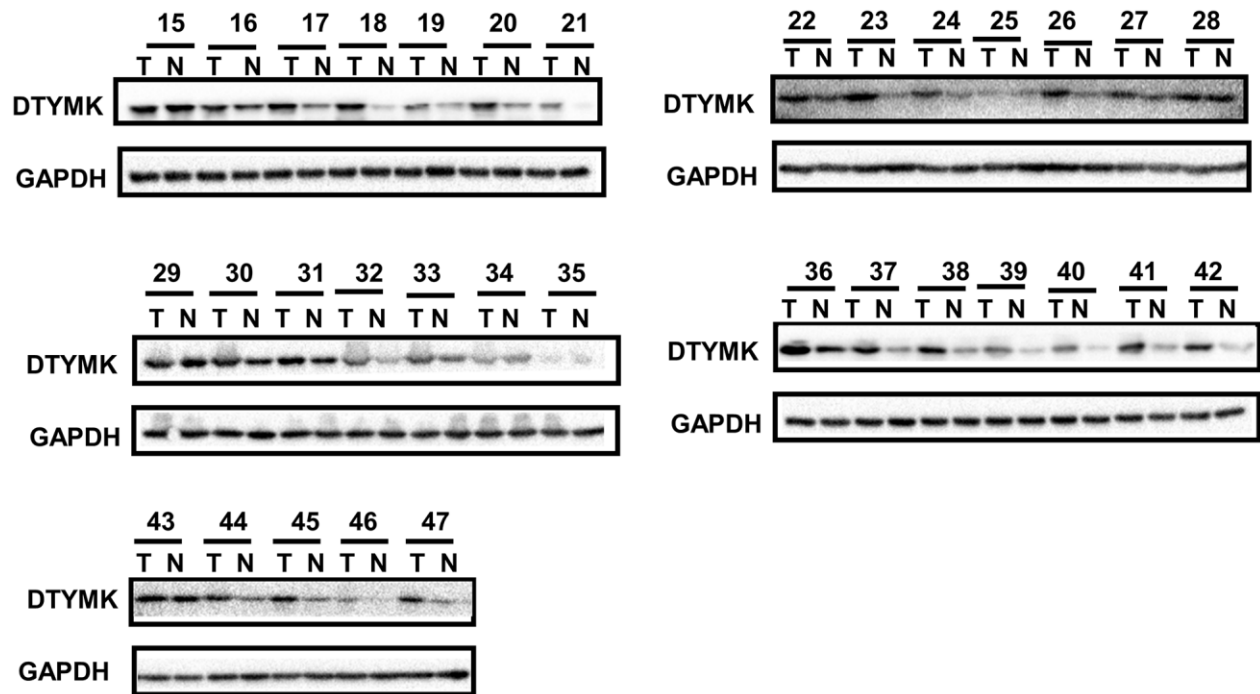

Supplementary Figure 1. The expression levels of DTYMK in HCC and adjacent noncancer tissues were evaluated by western blot.
